# Supplementary material for: Beyond the Journey: A Qualitative Analysis of Therapists’ Perspectives on Psychedelic Integration Challenges
Source: Research Square preprint supplement (doi:10.21203/rs.3.rs-6874539/v1), 2025-08-05
Supplement: Supplementary file 1 [file e6a9df010853f9c2c25bec35.docx]

**Supplementary Online Materials (Appendix) - Interview Guide**

**Introduction**

*Hi, my name is _______________* [Shortly introduce yourself. Include your institution].

*Thanks for volunteering for our study. We appreciate your time and expertise.*

*You were invited because you each have a unique perspective that we’d like to hear from. Your input is important and there are no wrong answers here.*

*Before we begin, I need to confirm that you are eligible for the study:*

- *Do you hold a current, active license as a mental health professional?*
- *Have you done psychedelic integration in a therapy context with at least 15 clients relating to their use of classic psychedelics (e.g., psilocybin, Ayahuasca, LSD) or MDMA? Integration work with ketamine does not count for the purposes of this study.*

**[Continue with interview guide if participant meets the criteria and discontinue study participation if participant does not meet criteria].**

**[Provide an overview of the meeting today]:**

*We’ll start off with you reviewing the informed consent form and answering any questions you might have about it.*

*Then we’ll have you fill out a brief survey to get some background information and demographics.*

*Then we’ll do the interview, which will be about 40 minutes long.*

*We’ll have you off the phone in about 50-55 minutes so you can get on with the rest of your day.*

*Before you start the survey I want to go over how we’re structuring the data collection to make sure your answers are anonymous.*

*First, the survey about your background and demographics will not be linked to any of your contact information or the interview.* 

*The interview is only being recorded via audio to help in making them less identifiable and then we will delete the audio files once they are transcribed.*

*We will need your contact info to send you your payment, but it’ll not be linked to any of your answers, so even if someone got ahold of the data, there would be no way to know who said what.*

*Basically, each piece – your demographics and background information, your interview answers, and your contact information will be stored separately so none of them can be linked.*

*You are also free to not answer any questions you aren’t comfortable with.*

*The reason we are telling you this is that we want you to be able to talk freely about your work regardless of its legal status.*

*Do you have any questions about the confidentiality and privacy of your answers at this point?*

**[Once they are ready, provide them with the survey link and have them fill it out.]**

**[Once they have completed the survey, frame the purpose of the interview]:**  
*The purpose of this study is to understand the most common difficulties and challenges that therapists and clients face in psychedelic integration so that we can improve psychedelic assisted therapy and help therapists know what to do to address them. We want to understand the full range of problems that clients are experiencing due to psychedelics and how therapists try to work with these during integration therapy.*

*Psychedelic integration is a broad term that might have different meanings for different people. For our purposes, we are defining integration therapy as: therapy conducted in regard to a client’s prior psychedelic experience(s) that can include one or more of the following:*

- *Addressing lingering distress*
- *Processing the experience*
- *Making sense of the experience*
- *Consolidating new insights/lessons*
- *Helping a client make changes*

*Does that make sense?*

*In psychedelic integration, we understand that some challenges can lead to positive therapeutic outcomes. For this interview, we are interested in anything that a client has struggled with or needed support around, even if it eventually resulted in growth or positive change. In other words, we aren’t focusing on negative cases, but rather we want to know the landscape of difficulties that show up for people in the days and weeks after they take psychedelics.*

*We want to be clear that during this interview, we’d like you to try to restrict your answers to therapy sessions that occur* ***after*** *the psychedelic experience -****not*** *preparation sessions. While we acknowledge that preparation is also important, for our purposes we’re wanting to focus on what you’ve observed in sessions that you’ve conducted after the client has used psychedelics.*

*For this interview, please only base your answers on your direct clinical experience. In other words, please do not rely on stories that you have heard, things you might have learned through reading or in psychedelic trainings, etc. We want your answers to reflect what you have experienced in sessions with clients.*

*Do you have any questions before we start?*

**[Once questions are answered, start the interview]:**

**Topic 1**:

1. You have previously indicated that you have conducted integration therapy with 15 or more clients. Could you tell me about the settings in which you have seen these clients?
2. *Let's begin by discussing the first topic.* Could you tell me about an instance where a client brought in a challenging psychedelic experience to work with in integration therapy?
   1. Have other clients you’ve worked with reported similar or related experiences?
   2. Does this often happen? Is this a common occurrence?
3. Can you tell me about other challenging psychedelic experiences your clients have had?
   1. Could you describe the range of challenges your clients have experienced in relation to integration?
   2. In your experience, are any of these issues more common than others?
4. Could you tell me about challenges that emerged after a delay, but still seemed to be related to the psychedelic experience?
   1. How common have these experiences been among your clients?
5. Are there any other things that your clients have found difficult to integrate?

[The following clarification points should be used if the participant seems to be misunderstanding the scope of the interview or asks questions related to the points below]:

- **If the participant details experience unrelated to integration sessions:**

*This question is not about adverse events that people have had while using psychedelics but weren’t a focus of therapy.*

*This question is not about psychedelics in general, but about circumstances related to integration therapy.*

*We want to hear about the kinds of difficulties that clients present with after their use of psychedelics, for example unresolved distress, confusion, disappointment or a change of beliefs that cause distress or impact functioning, or difficulties sharing with others or returning to daily life.*

- **If the client talks about problems they have heard of in general or in research, but not in their specific clients:**

One thing that is important here is that we’d like you to keep our focus on *concerns, difficulties, challenges, or problems that you have directly experienced your clients having*, not ones you’ve heard of in general.

- **If the participants answer is related to legal, political, social or normative issues, continue with:**

We are not asking about legal, political, or normative issues related to psychedelic-assisted therapy broadly, as a field.

- **If the participant asks about how the questions are phrased:**

We use the phrases difficulties, obstacles, problems, concerns, or challenges not to judge any experience as being harmful or helpful in terms of their eventual outcome, but to try to elicit from you the kinds of situations or difficulties that clients have presented to you that are related to psychedelic use.

**Topic 2:** *OK, let’s go onto the second part of the interview. In this part, we’d like to hear from you about how you typically address these challenges in integration therapy. We'd like to start with having you share three challenges that you want to talk about, so that you can tell us about how you’d normally approach them in therapy. If we have time for more than 3 challenges, then we can address these afterwards. What are the three challenges you’d most like to talk about? [start with getting a list of the 3 challenges they would like to start with]*

*OK, let’s start with the first/second/third one, which you said was _________. How have you responded to that issue in integration therapy when it has arisen?*

**[repeat this basic prompt for the other 2 challenges/problems]:**

Prompts for further exploration:

1. *How do you understand this challenge? What do you see as needing to be done to respond to this challenge when it occurs?*
2. *Why do you see this as a challenge that needs to be addressed in integration?*
3. *What kinds of problems may result if this issue or challenge is not addressed adequately in integration sessions?*
4. Has your approach to this issue changed over time?
5. *How do you know when this issue or challenge has been fully addressed?*

**[If there is extra time]:**

*Are there any other challenges or problems in integration you’d like to talk about?*   
*How have you addressed these?*

Follow up with as many of these as you have time for.  

**[As you conclude]:**

*We only have a couple more minutes before we need to wrap up. Is there anything else you’d like to relate to us before we finish up the interview?*   

**[Ending]**

*Thank you for participating. We appreciate your time and contribution and want to let you know that this information will be used to help improve the field of psychedelic-assisted therapy as more and more clinicians begin practicing in this area.*

*We’ll follow up shortly with your reimbursement for your time via email.*
